# Supplementary material
Source: ML conference proceedings conference paper supplement (https://proceedings.mlr.press/v89/yang19c.html)
Supplement: Supplementary file [file yang19c-supp.pdf]

## A Proofs

**Lemma 4.** Let  $g(\mathcal{S}) = \sum_{x \in Q(\mathcal{S})} f(x)$ , where  $Q(\mathcal{S})$  is defined in Eq. (3.3). If  $\forall x, f(x) \geq 0$ , then  $g$  is monotone supermodular.

*Proof.* Let  $\ell \in [L]$ , and  $j \in \mathcal{C}^{(\ell)}$  be any constraint at site  $\ell$ . For  $\mathcal{S} \subseteq \mathcal{C} \setminus \{j\}$ , define  $\Delta_g(j | \mathcal{S}) = \sum_{x \in Q(\mathcal{S} \cup \{j\})} f(x) - \sum_{x \in Q(\mathcal{S})} f(x)$  to be the gain of adding  $j$  to the set  $\mathcal{S}$ .

By definition of  $Q(\mathcal{S})$ , we have  $Q(\mathcal{S}) = \prod_{k=1}^L \mathcal{S}^{(k)}$ , and

$$\begin{aligned} Q(\mathcal{S} \cup \{j\}) &= (\mathcal{S}^{(\ell)} \cup \{j\}) \times \prod_{k \neq \ell} \mathcal{S}^{(k)} \\ &= \left( \{j\} \times \prod_{k \neq \ell} \mathcal{S}^{(k)} \right) \cup \left( \mathcal{S}^{(\ell)} \times \prod_{k \neq \ell} \mathcal{S}^{(k)} \right) \\ &= \left( \{j\} \times \prod_{k \neq \ell} \mathcal{S}^{(k)} \right) \cup \left( \prod_{k=1}^L \mathcal{S}^{(k)} \right) \end{aligned} \quad (\text{A.1})$$

Then,

$$\Delta_g(j | \mathcal{S}) = \sum_{x \in Q(\mathcal{S} \cup \{j\})} f(x) - \sum_{x \in Q(\mathcal{S})} f(x) \stackrel{\text{Eq. (A.1)}}{=} \sum_{x \in \{j\} \times \prod_{k \neq \ell} \mathcal{S}^{(k)}} f(x)$$

Now let us consider  $\mathcal{S}'$  such that  $\mathcal{S} \subseteq \mathcal{S}' \subseteq \mathcal{C} \setminus \{j\}$ . Clearly  $\forall k \in [L], \mathcal{S}^{(k)} \subseteq \mathcal{S}'^{(k)}$ . Therefore,  $\Delta_g(j | \mathcal{S}') - \Delta_g(j | \mathcal{S}) = \sum_{x \in \{j\} \times \prod_{k \neq \ell} (\mathcal{S}'^{(k)} \setminus \mathcal{S}^{(k)})} f(x) \geq 0$  and hence  $g$  is supermodular.  $\square$

### A.1 Proof of Lemma 2

We now show that Algorithm 3 leads to a polynomial algorithm for constructing a lower bound on Eq. (4.2), and hence on constructing a DS-decomposition of the surrogate objective function  $\hat{F}$  (Eq. (3.2)).

*Proof of Lemma 2.* Let  $g(\mathcal{S}) = \sum_{x \in Q(\mathcal{S})} f(x)$ . By definition we have

$$\hat{F}(\mathcal{S}) = g(\mathcal{S}) \left( 1 - \left( 1 - \frac{1}{|Q(\mathcal{S})|} \right)^n \right) = \underbrace{g(\mathcal{S})}_{\hat{F}_1(\mathcal{S})} - \underbrace{g(\mathcal{S}) \left( 1 - \frac{1}{|Q(\mathcal{S})|} \right)^n}_{\hat{F}_2(\mathcal{S})} = \hat{F}_1(\mathcal{S}) - \hat{F}_2(\mathcal{S})$$

We know from Lemma 4 that  $\hat{F}_1$  is supermodular. Let  $j \in \mathcal{C}$  and  $\mathcal{S} \subseteq \mathcal{C} \setminus \{j\}$ . The gain of  $j$  on  $\hat{F}_1$ , denote by  $\Delta_1(j | \mathcal{S})$ , is monotone decreasing.

Let  $\Delta_2(j | \mathcal{S}) = \hat{F}_2(\mathcal{S} \cup \{j\}) - \hat{F}_2(\mathcal{S})$ . Our goal is to find a lower bound on

$$\begin{aligned} \beta &= \min_{\mathcal{S} \subseteq \mathcal{S}' \subseteq \mathcal{C} \setminus j} (\Delta_{\hat{F}}(j | \mathcal{S}) - \Delta_{\hat{F}}(j | \mathcal{S}')) \\ &= \min_{\mathcal{S} \subseteq \mathcal{S}' \subseteq \mathcal{C} \setminus j} \left( \underbrace{\Delta_1(j | \mathcal{S}) - \Delta_1(j | \mathcal{S}')}_{\geq 0} + \Delta_2(j | \mathcal{S}) - \Delta_2(j | \mathcal{S}') \right) \end{aligned} \quad (\text{A.2})$$

Therefore, it suffices to find a lower bound  $\Delta_2(j | \mathcal{S}) - \Delta_2(j | \mathcal{S}')$ . The gain of  $j$  on  $\hat{F}_2$  is

$$\begin{aligned} \Delta_2(j | \mathcal{S}) &= \hat{F}_2(\mathcal{S} \cup \{j\}) - \hat{F}_2(\mathcal{S}) \\ &= \sum_{x \in Q(\mathcal{S} \cup \{j\})} f(x) \left(1 - \frac{1}{|Q(\mathcal{S} \cup \{j\})|}\right)^n - \sum_{x \in Q(\mathcal{S})} f(x) \left(1 - \frac{1}{|Q(\mathcal{S})|}\right)^n \\ &= \sum_{x \in Q(\mathcal{S} \cup \{j\}) \setminus Q(\mathcal{S})} f(x) \left(1 - \frac{1}{|Q(\mathcal{S} \cup \{j\})|}\right)^n + \\ &\quad \sum_{x \in Q(\mathcal{S})} f(x) \left( \left(1 - \frac{1}{|Q(\mathcal{S} \cup \{j\})|}\right)^n - \left(1 - \frac{1}{|Q(\mathcal{S})|}\right)^n \right) \end{aligned}$$

Let  $r(\mathcal{S}) = \left(1 - \frac{1}{|Q(\mathcal{S})|}\right)^n$ . Then, the above equation can be simplified as

$$\begin{aligned} \Delta_2(j | \mathcal{S}) &= \hat{F}_2(\mathcal{S} \cup \{j\}) - \hat{F}_2(\mathcal{S}) \\ &= \underbrace{\sum_{x \in Q(\mathcal{S} \cup \{j\}) \setminus Q(\mathcal{S})} f(x) r(\mathcal{S} \cup \{j\})}_{T_1(\mathcal{S})} + \underbrace{\sum_{x \in Q(\mathcal{S})} f(x) (r(\mathcal{S} \cup \{j\}) - r(\mathcal{S}))}_{T_2(\mathcal{S})} \end{aligned}$$

It is easy to verify that  $T_1(\mathcal{S})$  is monotone increasing function of  $\mathcal{S}$ . Let us consider  $\mathcal{S}'$  such that  $\mathcal{S} \subseteq \mathcal{S}' \subseteq \mathcal{C} \setminus \{j\}$ . We have

$$\begin{aligned} \Delta_2(j | \mathcal{S}') - \Delta_2(j | \mathcal{S}) &\geq T_2(\mathcal{S}') - T_2(\mathcal{S}) \\ &\stackrel{T_2 \geq 0}{\geq} -g(\mathcal{S})(r(\mathcal{S} \cup \{j\}) - r(\mathcal{S})) \end{aligned}$$

Therefore, it suffices to find a lower bound on  $-g(\mathcal{S})(r(\mathcal{S} \cup \{j\}) - r(\mathcal{S}))$ . Further notice that

$$0 \leq g(\mathcal{S}) \leq \max_{\mathcal{T}: |\mathcal{T}| \leq |Q(\mathcal{S})|} \sum_{x \in \mathcal{T}} f(x) \quad (\text{A.3})$$

and it is not hard to verify that

$$0 \leq r(\mathcal{S} \cup \{j\}) - r(\mathcal{S}) \leq \left(1 - \frac{1}{|Q(\mathcal{S})|}\right)^n - \left(1 - \frac{1}{2|Q(\mathcal{S})|}\right)^n \quad (\text{A.4})$$

Therefore, combining term (A.3) with (A.4), we get a lower bound on  $\beta$ :

$$\beta \geq - \max_{s \in \{1, \dots, |Q(\mathcal{C})|\}} \left( \left( \left(1 - \frac{1}{s}\right)^n - \left(1 - \frac{1}{2s}\right)^n \right) \underbrace{\max_{\mathcal{T}: |\mathcal{T}| \leq s} \sum_{x \in \mathcal{T}} f(x)}_{\text{Term 2}} \right) \quad (\text{A.5})$$

Note that term 2 is a modular function and can be optimized greedily. Therefore, computing the RHS of Eq. A.5 can be efficiently done in polynomial time w.r.t.  $|Q(\mathcal{C})|$ .  $\square$

## A.2 Proof of Lemma 3: Difference of Convex Construction of DS Decomposition

**Lemma 5.** *Let  $g : 2^{\mathcal{C}} \rightarrow \mathbb{R}_{\geq 0}$  be a non-negative, non-decreasing supermodular function, and  $u : \mathbb{R} \rightarrow \mathbb{R}$  be a non-decreasing convex function. For  $\mathcal{S} \subseteq \mathcal{C}$ , define  $h(\mathcal{S}) = g(\mathcal{S}) \cdot u(|\mathcal{S}|)$ . Then  $h$  is supermodular.*

*Proof.* Let  $j \in \mathcal{C}$  and  $\mathcal{S} \subseteq \mathcal{C} \setminus \{j\}$ . The gain of  $j$  is

$$\begin{aligned} \Delta_h(j | \mathcal{S}) &= h(\mathcal{S} \cup \{j\}) - h(\mathcal{S}) \\ &= g(\mathcal{S} \cup \{j\}) \cdot u(|\mathcal{S} \cup \{j\}|) - g(\mathcal{S}) \cdot u(|\mathcal{S}|) \\ &= (g(\mathcal{S} \cup \{j\}) - g(\mathcal{S})) \cdot u(|\mathcal{S} \cup \{j\}|) + g(\mathcal{S}) (u(|\mathcal{S} \cup \{j\}|) - u(|\mathcal{S}|)) \end{aligned}$$

Let us consider  $\mathcal{S}'$  such that  $\mathcal{S} \subseteq \mathcal{S}' \subseteq \mathcal{C} \setminus \{j\}$ . We have

$$\begin{aligned} \Delta_h(j | \mathcal{S}) &= (g(\mathcal{S} \cup \{j\}) - g(\mathcal{S})) \cdot u(|\mathcal{S} \cup \{j\}|) + g(\mathcal{S}) (u(|\mathcal{S} \cup \{j\}|) - u(|\mathcal{S}|)) \\ &\stackrel{(a)}{\leq} (g(\mathcal{S}' \cup \{j\}) - g(\mathcal{S}')) \cdot u(|\mathcal{S}' \cup \{j\}|) + g(\mathcal{S}) (u(|\mathcal{S} \cup \{j\}|) - u(|\mathcal{S}|)) \\ &\stackrel{(b)}{\leq} (g(\mathcal{S}' \cup \{j\}) - g(\mathcal{S}')) \cdot u(|\mathcal{S}' \cup \{j\}|) + g(\mathcal{S}') (u(|\mathcal{S}' \cup \{j\}|) - u(|\mathcal{S}'|)) \\ &= \Delta_h(j | \mathcal{S}') \end{aligned}$$

where step (a) is due to  $g$  being monotone supermodular (i.e.,  $g(\mathcal{S}' \cup \{j\}) - g(\mathcal{S}') \geq g(\mathcal{S} \cup \{j\}) - g(\mathcal{S}) \geq 0$ ) and  $u$  being monotone (i.e.,  $u(|\mathcal{S}' \cup \{j\}|) \geq u(|\mathcal{S} \cup \{j\}|)$ ); step (b) is due to  $g$  being non-negative monotone (i.e.,  $g(\mathcal{S}') \geq g(\mathcal{S}) \geq 0$ ) and  $u$  being convex (i.e.,  $u(|\mathcal{S}' \cup \{j\}|) - u(|\mathcal{S}'|) \geq u(|\mathcal{S} \cup \{j\}|) - u(|\mathcal{S}|)$ ). Therefore  $h$  is supermodular.  $\square$

**Lemma 6.** *Let  $w : \mathbb{R} \rightarrow \mathbb{R}$  be a convex function and  $u : \mathbb{R} \rightarrow \mathbb{R}$  a convex non-decreasing function, then  $u \circ w$  is convex. Furthermore, if  $w$  is non-decreasing, then the composition is also non-decreasing.*

*Proof.* By convexity of  $w$ :

$$w(\alpha x + (1 - \alpha)y) \leq \alpha w(x) + (1 - \alpha)w(y).$$

Therefore, we get

$$\begin{aligned} u(w(\alpha x + (1 - \alpha)y)) &\stackrel{(a)}{\leq} u(\alpha w(x) + (1 - \alpha)w(y)) \\ &\stackrel{(b)}{\leq} \alpha u(w(x)) + (1 - \alpha)u(w(y)). \end{aligned}$$

Here, step (a) is due to the fact that  $u$  is non-decreasing, and step (b) is due to the convexity of  $u$ . Therefore  $u \circ w$  is convex. If  $w$  is non-decreasing, it is clear that  $u \circ w$  is also non-decreasing, hence completes the proof.  $\square$

**Lemma 7 (Horst & Thoi (1999)).** *Let  $r : \mathbb{R} \rightarrow \mathbb{R}$  be a non-decreasing, twice continuously differentiable function. Then  $r$  can be represented as the difference between two non-decreasing convex functions.*

*Proof.* Let  $u : \mathbb{R} \rightarrow \mathbb{R}$  be a non-decreasing, strictly convex function, and  $\alpha = \min_x u''(x)$ ; clearly,  $\alpha > 0$ .

Let  $\beta = |\min_x r''(x)|$ . Define

$$v(x) = r(x) + \frac{\beta}{\alpha}u(x) \tag{A.6}$$

It is easy to verify that

$$v''(x) = r''(x) + \frac{\beta}{\alpha}u''(x) \geq r''(x) + \beta \geq 0.$$

Hence,  $v(x)$  is convex. Furthermore, since both  $r$  and  $u$  are non-decreasing,  $v$  is also non-decreasing. Therefore,  $r(x) = v(x) - \frac{\beta}{\alpha}u(x)$  is the difference between two non-decreasing convex functions.  $\square$

**Lemma 8.** *Let  $r : \mathbb{R} \rightarrow \mathbb{R}$  be a non-decreasing, twice continuously differentiable function, and  $w : \mathbb{R} \rightarrow \mathbb{R}$  a convex non-decreasing function, then  $r \circ w$  can be represented as the difference between two non-decreasing convex functions.*

*Proof.* By Lemma 7, we can represent  $r(x) = v(x) - \frac{\beta}{\alpha}u(x)$ , where  $u, v$  are non-decreasing convex functions, and  $\alpha, \beta$  are as defined in Eq. (A.6). Therefore,

$$r \circ w(x) = v \circ w(x) - \frac{\beta}{\alpha} \cdot u \circ w(x)$$

By Lemma 6,  $v \circ w$  and  $u \circ w$  are both non-decreasing convex, which completes the proof.  $\square$

Now we are ready to prove Lemma 3.

*Proof of Lemma 3.* Let  $g(\mathcal{S}) = \sum_{x \in Q(\mathcal{S})} f(x)$ . By definition we have

$$\hat{F}(\mathcal{S}) = g(\mathcal{S}) \left( 1 - \left( 1 - \frac{1}{|Q(\mathcal{S})|} \right)^n \right) = g(\mathcal{S}) - g(\mathcal{S}) \left( 1 - \frac{1}{|Q(\mathcal{S})|} \right)^n$$

Let  $r(x) = \left( 1 - \frac{1}{x} \right)^n$ , and  $w : \mathbb{R} \rightarrow \mathbb{R}$  be a convex function, such that  $w(|\mathcal{S}|) = |Q(\mathcal{S})|$ . Note that such function  $w$  exists, because the set function  $h(\mathcal{S}) := |Q(\mathcal{S})|$  is supermodular. Therefore, we have

$$\hat{F}(\mathcal{S}) = g(\mathcal{S}) - g(\mathcal{S}) \cdot r \circ w(|\mathcal{S}|)$$

Furthermore, note that  $r$  is non-decreasing, twice continuously differentiable at  $[1, \infty)$ . By Lemma 8, we get

$$\begin{aligned} \hat{F}(\mathcal{S}) &= g(\mathcal{S}) - g(\mathcal{S}) \cdot \left( v \circ w(|\mathcal{S}|) - \frac{\beta}{\alpha} \cdot u \circ w(|\mathcal{S}|) \right) \\ &= g(\mathcal{S}) \left( 1 + \frac{\beta}{\alpha} \cdot u \circ w(|\mathcal{S}|) \right) - g(\mathcal{S}) \cdot (v \circ w(|\mathcal{S}|)), \end{aligned} \tag{A.7}$$

where  $u : \mathbb{R} \rightarrow \mathbb{R}$  can be any non-decreasing, strictly convex function,  $\alpha = \min_x u''(x)$ ,  $\beta = |\min_{x \geq 1} r''(x)|$ , and  $v(x) = r(x) + \frac{\beta}{\alpha} u(x)$ .

We know from Lemma 4 that  $g$  is supermodular. Since both  $1 + \frac{\beta}{\alpha} \cdot u \circ w(x)$  and  $v \circ w(x)$  are convex, then by Lemma 5, we know that both terms on the R.H.S. of Eq. (A.7) are supermodular, and hence we obtain a DS decomposition of function  $\hat{F}$ .  $\square$

## B Supplemental Figures

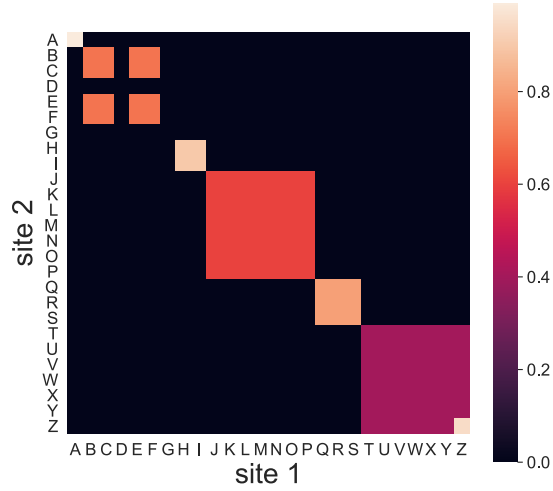

Figure S1: The cell values for the synthetic dataset with  $L = 2$  and  $|\mathcal{C}^{(\ell)}| = 26 \forall \ell \in \{1, 2\}$ .

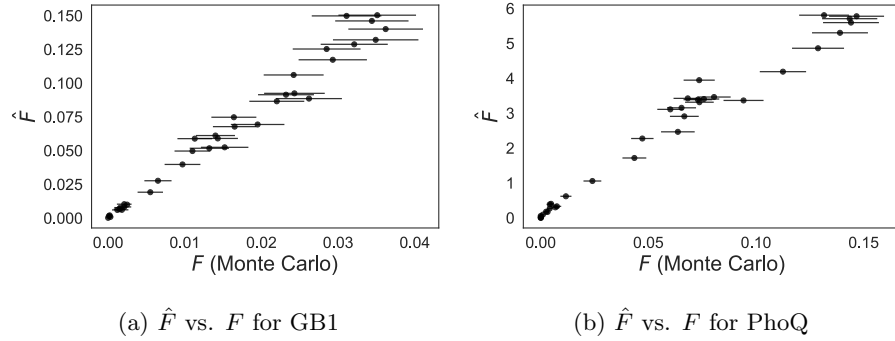

Figure S2: Comparing  $\hat{F}$  (Eq. (3.2)) against the Monte Carlo estimates of  $F$  (Eq. (3.1)). Error bars are standard errors for the Monte Carlo estimates. The approximate objective correlates well with Monte Carlo estimates of the exact objective.
